# Supplementary material
Source: PubMed Central journal article supplement (PMC7471354)
Supplement: ajcr0010-2582-f4.pdf [file ajcr0010-2582-f4.pdf]

## Genetic variants in the NLRP3 inflammasome pathway

**Table S1.** Comparison of the characteristics between the PLCO trial and the HLCS study

| Characteristics                  | PLCO      |            | HLCS      |            | <i>P</i> <sup>a</sup> |
|----------------------------------|-----------|------------|-----------|------------|-----------------------|
|                                  | Frequency | Deaths (%) | Frequency | Deaths (%) |                       |
| Total                            | 1185      | 798 (67.3) | 984       | 665 (67.5) |                       |
| Median overall survival (months) | 23.8      |            | 39.9      |            |                       |
| Age                              |           |            |           |            |                       |
| ≤ 71                             | 636       | 400 (62.9) | 654       | 428 (65.4) |                       |
| > 71                             | 549       | 398 (72.5) | 330       | 237 (71.8) | < 0.0001              |
| Sex                              |           |            |           |            |                       |
| Male                             | 698       | 507 (72.6) | 507       | 379 (74.7) |                       |
| Female                           | 487       | 291 (59.8) | 477       | 286 (59.9) | 0.0006                |
| Smoking status                   |           |            |           |            |                       |
| Never                            | 115       | 63 (54.8)  | 92        | 52 (56.5)  |                       |
| Current                          | 423       | 272 (64.3) | 390       | 266 (68.2) |                       |
| Former                           | 647       | 463 (71.6) | 502       | 347 (69.1) | 0.166                 |
| Histology                        |           |            |           |            |                       |
| Adenocarcinoma                   | 577       | 348 (60.3) | 597       | 378 (63.3) |                       |
| Squamous cell carcinoma          | 285       | 192 (67.4) | 216       | 156 (72.2) |                       |
| Others                           | 323       | 258 (79.9) | 171       | 131 (76.6) | < 0.0001              |
| Stage                            |           |            |           |            |                       |
| I-III A                          | 655       | 315 (48.1) | 606       | 352 (58.0) |                       |
| III B-IV                         | 528       | 482 (91.3) | 377       | 313 (83.0) | 0.003                 |
| Missing                          | 2         |            | --        |            |                       |

<sup>a</sup>Chi-square test for comparisons of the characteristics between the PLCO trial and the Harvard study. Abbreviations: PLCO, Prostate, Lung, Colorectal and Ovarian Cancer Screening Trial; HLCS, Harvard lung cancer susceptibility study.

## Genetic variants in the NLRP3 inflammasome pathway

**Table S2.** List of 176 selected genes in the NLRP3 Inflammasome gene-set from MSigDB and Genecards

| Dataset                                                                           | Name of pathway <sup>a</sup>                      | Selected genes                                                                                                                                                                                                                                                                                                                                                                                                                                                                                                                                                                                                                                                                                                                                                                                                                                                                                                                                                                 | Number of genes |
|-----------------------------------------------------------------------------------|---------------------------------------------------|--------------------------------------------------------------------------------------------------------------------------------------------------------------------------------------------------------------------------------------------------------------------------------------------------------------------------------------------------------------------------------------------------------------------------------------------------------------------------------------------------------------------------------------------------------------------------------------------------------------------------------------------------------------------------------------------------------------------------------------------------------------------------------------------------------------------------------------------------------------------------------------------------------------------------------------------------------------------------------|-----------------|
| KEGG                                                                              | NOD-like receptor signaling pathway               | <i>BIRC2, BIRC3, CARD18, CARD6, CARD8, CARD9, CASP1, CASP5, CASP8, CCL11, CCL13, CCL2, CCL5, CCL7, CCL8, CHUK, CXCL1, CXCL2, ERBB2IP, HSP90AA1, HSP90AB1, HSP90B1, IKBKB, IKBKG, IL18, IL1B, IL6, IL8, MAP3K7, MAPK1, MAPK10, MAPK11, MAPK12, MAPK13, MAPK14, MAPK3, MAPK8, MAPK9, MEFV, NAIIP, NFKB1, NFKBIA, NFKBIB, NLRC4, NLRP1, NLRP3, NOD1, NOD2, PSTPIP1, PYCARD, PYDC1, RELA, RIPK2, SUGT1, TAB1, TAB2, TAB3, TNF, TNFAIP3, TRAF6, TRIP6, XIAP</i>                                                                                                                                                                                                                                                                                                                                                                                                                                                                                                                     | 62              |
| REACTOME                                                                          | Inflammasomes                                     | <i>AIM2, APP, BCL2, BCL2L1, CASP1, HSP90AB1, LOC644816, MEFV, NLRC4, NLRP1, NLRP3, P2RX7, PANX1, PSTPIP1, PYCARD, TXN, TXNIP</i>                                                                                                                                                                                                                                                                                                                                                                                                                                                                                                                                                                                                                                                                                                                                                                                                                                               | 17              |
| REACTOME                                                                          | The NLRP3 inflammasome                            | <i>APP, CASP1, HSP90AB1, LOC644816, MEFV, NLRP3, P2RX7, PANX1, PSTPIP1, PYCARD, TXN, TXNIP</i>                                                                                                                                                                                                                                                                                                                                                                                                                                                                                                                                                                                                                                                                                                                                                                                                                                                                                 | 12              |
| GO                                                                                | Regulation of NLRP3 inflammasome complex assembly | <i>ATAT1, CD36, EIF2AK2, GBP5, MEFV, NLRP2P, PYDC1, PYDC2, SIRT2, TLR4, TLR6</i>                                                                                                                                                                                                                                                                                                                                                                                                                                                                                                                                                                                                                                                                                                                                                                                                                                                                                               | 11              |
| Genecards ( <a href="https://www.genecards.org/">https://www.genecards.org/</a> ) | NLRP3_Inflammasome_Lung cancer                    | <i>TP53, EGFR, NLRP3, IL1B, TNF, IL6, CASP8, TGFB1, IFNG, IL10, TLR4, BRCA1, CCL2, NLRP1, PRKN, TP73, TLR2, BIRC3, MEFV, IL1RN, CASP1, SERPINA1, CXCL8, PDCD1, BCL2L1, CASP3, BCL2, TLR9, CCL3, NFKB1, CD36, MAPK1, JUN, FGF2, MAPK8, CASP9, MTOR, P2RX7, IL18, CTLA4, BCL10, RELA, CREB1, HSP90AA1, TLR5, NLRC4, NOD2, HMOX1, AGT, CTSB, CFLAR, FLT3, IL1A, ITGB1, CCL5, CLEC7A, CD274, FN1, NAIIP, BIRC2, CARD8, CD209, STAT1, BTK, APAF1, HLA-G, CASR, PTPN22, SYK, MALT1, PSTPIP1, IFNA1, IL17A, C3, IL12B, HMGB1, APOA1, S100B, CASP7, CXCL1, SNCA, PIK3CG, LGALS3, NRG1, C5, ATF6, PML, IL1R1, IFIH1, S100A8, MYD88, S100A9, CD40, LEP, NPPA, TLR6, OLR1, IFNB1, DHX9, CAMP, TLR3, SAA1, JAK1, MAPK14, CCL4, NOD1, HSP90AB1, IL6ST, IRF3, CARD11, CYBB, MIF, IRF7, TREX1, TRIM21, RAC1, CARD9, DDX58, UBC, TLR7, H2AFX, UMOD, IRAK3, XDH, LY96, IL18BP, AGER, TNFAIP3, CD14, IL23A, HSPA1A, IL33, ORMDL3, CYBA, NCF1, IRAK4, IRAK1, LBP, IL27, MYO1C, IL37, ATP6VOA2</i> | 142             |
| Gene removed <sup>a</sup>                                                         |                                                   | <i>PRKN, BTK, CYBB, TLR7, IRAK1, LOC644816, IKBKG, IL8, TAB3, XIAP, NLRP2P</i>                                                                                                                                                                                                                                                                                                                                                                                                                                                                                                                                                                                                                                                                                                                                                                                                                                                                                                 | 11              |
| <b>Total genes</b>                                                                |                                                   |                                                                                                                                                                                                                                                                                                                                                                                                                                                                                                                                                                                                                                                                                                                                                                                                                                                                                                                                                                                | <b>176</b>      |

<sup>a</sup>Gene in X chromosome was removed; Keyword for MSigDB and Genecards: NLRP3; Inflammasome. Organism: Homo sapiens. Abbreviation: MSigDB = Molecular signatures database.

## Genetic variants in the NLRP3 inflammasome pathway

**Table S3.** Associations of the first 10 principal components and OS of NSCLC in the PLCO trial

| PC*  | Parameter Estimate | Standard Error | Chi-Square | P       |
|------|--------------------|----------------|------------|---------|
| PC1  | 4.821              | 1.353          | 12.697     | < 0.001 |
| PC2  | -0.681             | 1.228          | 0.308      | 0.579   |
| PC3  | -3.054             | 0.949          | 10.351     | 0.001   |
| PC4  | -2.837             | 1.246          | 5.184      | 0.023   |
| PC5  | -0.910             | 1.232          | 0.546      | 0.460   |
| PC6  | 1.355              | 1.252          | 1.172      | 0.279   |
| PC7  | -0.236             | 1.218          | 0.038      | 0.846   |
| PC8  | -1.684             | 1.322          | 1.622      | 0.203   |
| PC9  | -1.886             | 1.267          | 2.216      | 0.137   |
| PC10 | 0.347              | 1.240          | 0.078      | 0.180   |

\*The top four PCs were used for the adjustment for potential population stratification in the multivariate analysis. Abbreviations: OS, overall survival; NSCLC, non-small cell lung cancer; PLCO, the Prostate, Lung, Colorectal and Ovarian Cancer Screening Trial; PC, principal component.

## Genetic variants in the NLRP3 inflammasome pathway

**Table S4.** Functional prediction analyses of the two validated SNPs

| SNP        | Gene         | Chr. | Allele | MAF  | Regulome DB Score | HaploReg v4.1          |                        |                                                           |                  |                    |                           |
|------------|--------------|------|--------|------|-------------------|------------------------|------------------------|-----------------------------------------------------------|------------------|--------------------|---------------------------|
|            |              |      |        |      |                   | Promoter histone marks | Enhancer histone marks | DNase                                                     | Motifs changed   | Selected eQTL hits | dbSNP function annotation |
| rs4733124  | <i>NRG1</i>  | 8    | T/C    | 0.19 | 4                 | --                     | BRST, SKIN             | BRST <sup>a</sup> , SKIN <sup>b</sup> , BRST <sup>c</sup> | GZF1, Pax-4      | --                 | intronic                  |
| rs11225211 | <i>BIRC3</i> | 11   | G/A    | 0.16 | --                | --                     | BLD                    | --                                                        | 4 altered motifs | 2 hits             | intronic                  |

<sup>a</sup>Breast variant Human Mammary Epithelial Cells; <sup>b</sup>Foreskin Fibroblast Primary Cells; <sup>c</sup>Breast Myoepithelial Primary Cells. Abbreviation: SNP = Single nucleotide polymorphisms; MAF = Minor allele frequency.

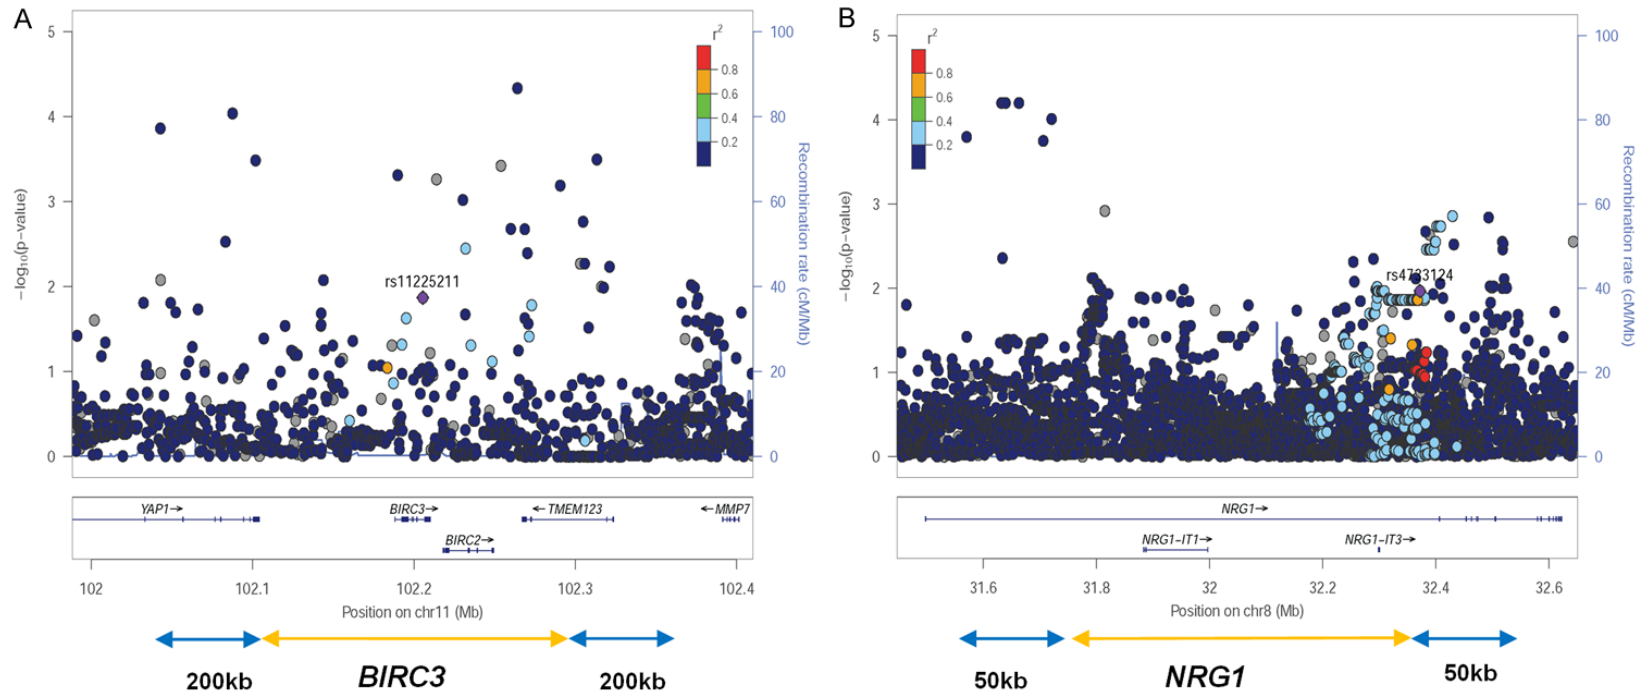

**Figure S1.** Regional association plots. The left-hand Y-axis shows the  $-\log_{10}$  transformation of  $P$ -value of individual SNPs, which is plotted against the chromosomal base-pair position with an expansion of 500 KB in the flanks of the gene region. The right-hand Y-axis shows the recombination rate estimated for European populations from HapMap Data Rel 22/phase II. A. *XDH* rs141674738; B. *NRG1* rs4733124.

## Genetic variants in the NLRP3 inflammasome pathway

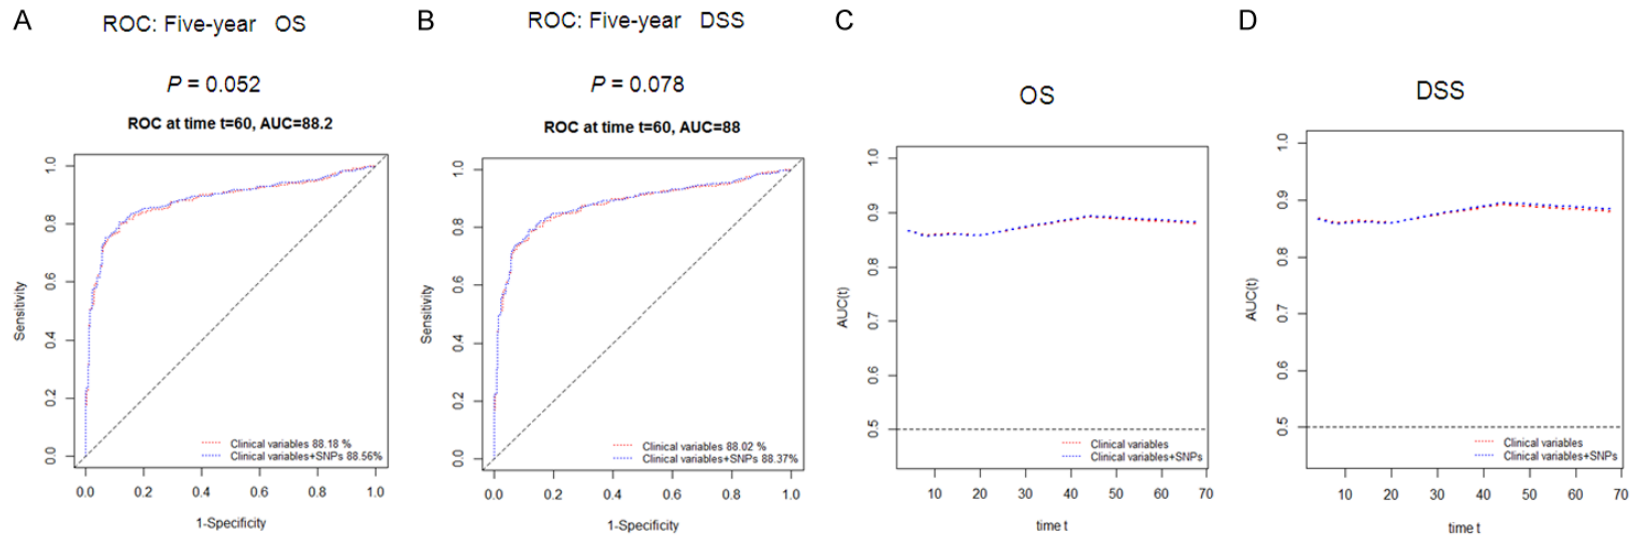

**Figure S2.** Receiver operating characteristic (ROC) curve and time-dependent area under the ROC curve (AUC) estimation for prediction of OS/DSS using the PLCO dataset. A. Five-year NSCLC overall survival rate, red line indicates clinical variables 88.18%; blue line indicates clinical variables + unfavorable genotypes 88.56%; B. Five-year NSCLC disease-specific survival rate, red line indicates clinical variables 88.02%; blue line indicates clinical variables + unfavorable genotypes 88.37%; C. Time-dependent AUC estimation (OS), based on age, sex, smoking status, histology, tumor stage, chemotherapy, radiotherapy, surgery, principal components and the protective genotypes of the two SNPs. time  $t$  = time (months); D. Time-dependent AUC estimation (DSS), based on age, sex, smoking status, histology, tumor stage, chemotherapy, radiotherapy, surgery, principal components and the protective genotypes of the two SNPs. time  $t$  = time (months).

## Genetic variants in the NLRP3 inflammasome pathway

**Table S5.** Stratified multivariate analyses for association between risk genotypes and OS/DSS in NSCLC patients in the PLCO trial

| Characteristics | No. of 1-2 risk genotypes |            | No. of 0 risk genotype |            | OS Multivariate analysis <sup>a</sup> |        | $P_{inter}^b$ | DSS Multivariate analysis <sup>a</sup> |       | $P_{inter}^b$ |
|-----------------|---------------------------|------------|------------------------|------------|---------------------------------------|--------|---------------|----------------------------------------|-------|---------------|
|                 | All                       | Death (%)  | All                    | Death (%)  | HR (95% CI)                           | $P$    |               | HR (95% CI)                            | $P$   |               |
| Age (years)     |                           |            |                        |            |                                       |        |               |                                        |       |               |
| ≤ 71            | 503                       | 334 (66.4) | 131                    | 65 (49.6)  | 0.80 (0.61-1.05)                      | 0.108  |               | 0.92 (0.70-1.21)                       | 0.551 |               |
| > 71            | 406                       | 295 (72.7) | 133                    | 94 (70.7)  | 0.79 (0.62-1.00)                      | 0.051  | 0.088         | 0.77 (0.60-1.00)                       | 0.048 | 0.924         |
| Sex             |                           |            |                        |            |                                       |        |               |                                        |       |               |
| Male            | 533                       | 399 (74.9) | 160                    | 105 (65.6) | 0.80 (0.64-0.99)                      | 0.044  |               | 0.86 (0.68-1.08)                       | 0.201 |               |
| Female          | 376                       | 230 (61.2) | 104                    | 54 (51.9)  | 0.71 (0.53-0.97)                      | 0.030  | 0.787         | 0.73 (0.53-1.00)                       | 0.047 | 0.468         |
| Smoking status  |                           |            |                        |            |                                       |        |               |                                        |       |               |
| Never           | 81                        | 43 (53.1)  | 33                     | 19 (57.6)  | 1.04 (0.56-1.95)                      | 0.903  |               | 1.01 (0.54-1.89)                       | 0.989 |               |
| Current         | 328                       | 215 (65.6) | 87                     | 50 (57.5)  | 0.72 (0.53-1.00)                      | 0.046  |               | 0.80 (0.58-1.12)                       | 0.198 |               |
| Former          | 500                       | 371 (74.2) | 144                    | 90 (62.50) | 0.81 (0.64-1.02)                      | 0.075  | 0.558         | 0.85 (0.66-1.08)                       | 0.178 | 0.613         |
| Histology       |                           |            |                        |            |                                       |        |               |                                        |       |               |
| Adenocarcinoma  | 429                       | 271 (63.2) | 145                    | 75 (51.7)  | 0.62 (0.48-0.81)                      | 0.0004 |               | 0.67 (0.51-0.88)                       | 0.004 |               |
| Squamous        | 220                       | 147 (66.8) | 63                     | 43 (68.3)  | 1.08 (0.76-1.54)                      | 0.681  |               | 1.29 (0.89-1.87)                       | 0.177 |               |
| Others          | 260                       | 211 (81.2) | 56                     | 41 (73.2)  | 0.85 (0.60-1.20)                      | 0.342  | 0.032         | 0.80 (0.55-1.16)                       | 0.237 | 0.432         |
| Tumor stage     |                           |            |                        |            |                                       |        |               |                                        |       |               |
| I-III A         | 504                       | 260 (51.6) | 149                    | 54 (36.2)  | 0.68 (0.51-0.92)                      | 0.012  |               | 0.75 (0.54-1.04)                       | 0.089 |               |
| III B-IV        | 405                       | 369 (91.1) | 115                    | 105 (91.3) | 0.84 (0.67-1.05)                      | 0.119  | 0.097         | 0.85 (0.68-1.07)                       | 0.162 | 0.387         |
| Chemotherapy    |                           |            |                        |            |                                       |        |               |                                        |       |               |
| No              | 490                       | 300 (61.2) | 147                    | 66 (44.9)  | 0.61 (0.46-0.81)                      | 0.0005 |               | 0.64 (0.47-0.86)                       | 0.003 |               |
| Yes             | 419                       | 329 (78.5) | 117                    | 93 (79.5)  | 1.01 (0.80-1.29)                      | 0.911  | 0.007         | 1.05 (0.82-1.33)                       | 0.719 | 0.010         |
| Radiotherapy    |                           |            |                        |            |                                       |        |               |                                        |       |               |
| No              | 582                       | 363 (62.4) | 178                    | 86 (48.3)  | 0.75 (0.59-0.95)                      | 0.019  |               | 0.80 (0.62-1.04)                       | 0.096 |               |
| Yes             | 327                       | 266 (81.4) | 86                     | 73 (84.9)  | 0.88 (0.67-1.15)                      | 0.334  | 0.436         | 0.90 (0.69-1.19)                       | 0.457 | 0.564         |
| Surgery         |                           |            |                        |            |                                       |        |               |                                        |       |               |
| No              | 497                       | 439 (88.3) | 137                    | 125 (91.2) | 0.95 (0.77-1.17)                      | 0.614  |               | 0.97 (0.78-1.20)                       | 0.763 |               |
| Yes             | 412                       | 190 (46.1) | 127                    | 34 (26.8)  | 0.49 (0.34-0.72)                      | 0.0002 | 0.002         | 0.55 (0.36-0.83)                       | 0.004 | 0.012         |

<sup>a</sup>Adjusted for age, sex, stage, histology, smoking status, chemotherapy, radiotherapy, surgery, PC1, PC2, PC3 and PC4; One observations missing of *NRG1* rs4733124, One observations missing of *BIRC3* rs11225211; Two observations missing of tumor stage and eight observations missing of chemotherapy/radiotherapy/surgery in PLCO dataset. <sup>b</sup> $P_{inter}$ :  $P$ -value for interaction analysis between characteristic and number of protective genotypes; Abbreviation: OS = Overall survival; NSCLC = Non-small cell lung cancer; HR = Hazards ratio; 95% CI = 95% Confidence interval.

## Genetic variants in the NLRP3 inflammasome pathway

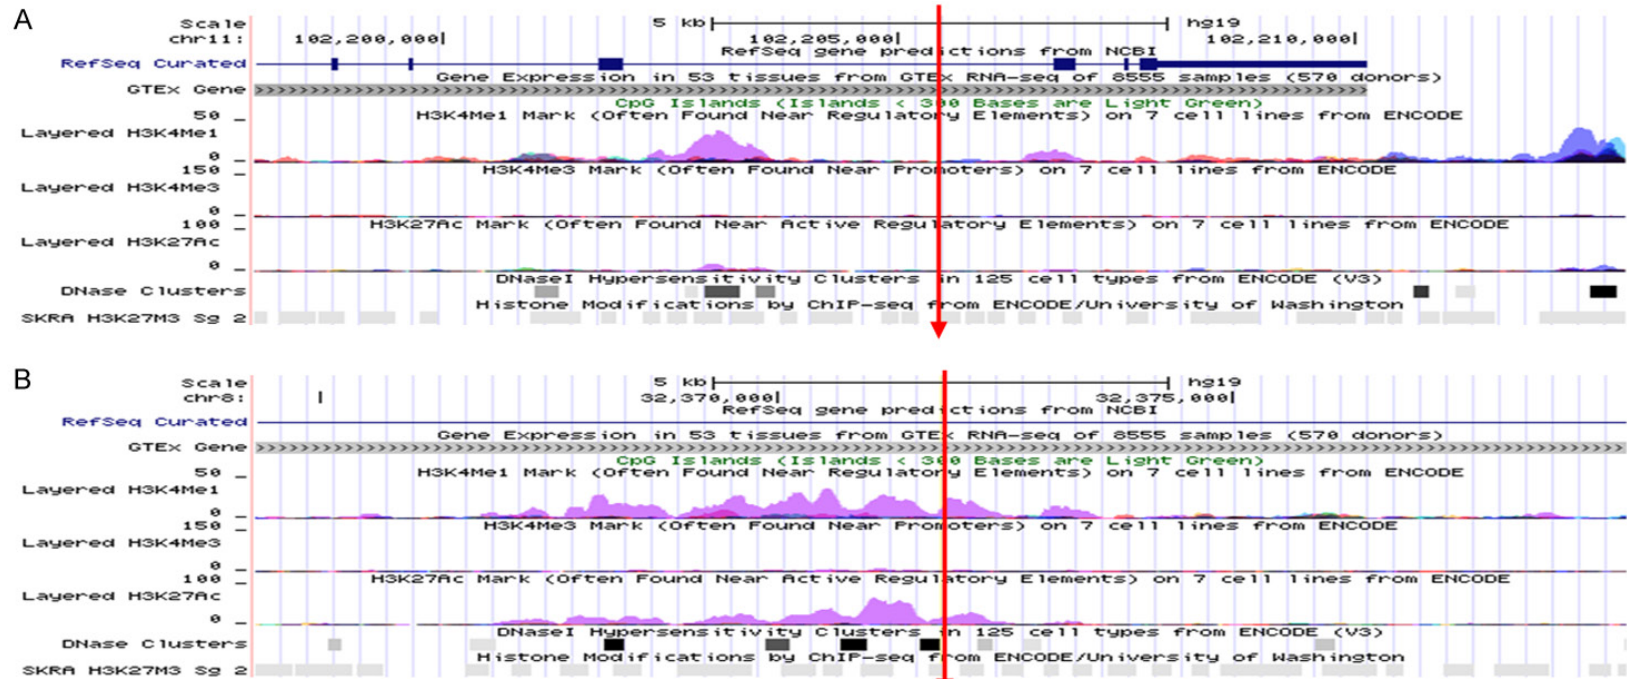

**Figure S3.** Functional prediction of SNPs in the ENCODE project. (A) Location and functional prediction of SNPs rs11225211, (B) Location and functional prediction of SNPs rs4733124.

## Genetic variants in the NLRP3 inflammasome pathway

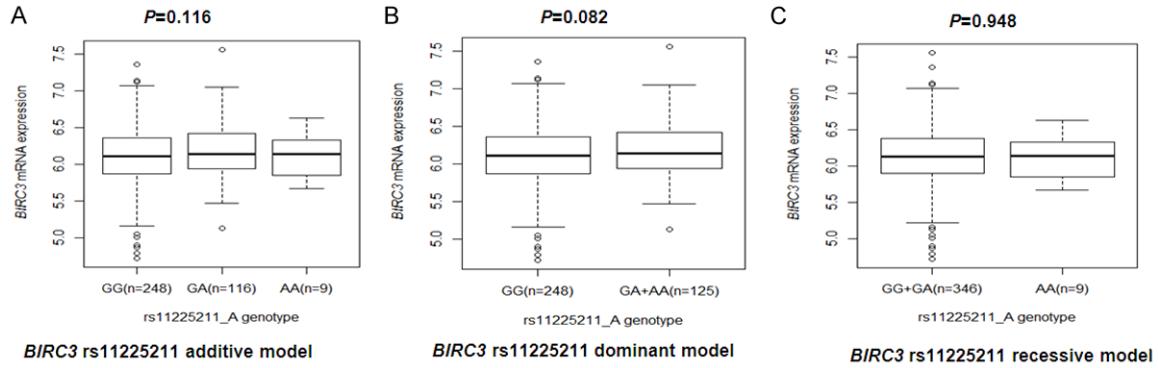

**Figure S4.** eQTL analysis of *BIRC3* rs11225211 genotypes and corresponding gene mRNA expression in 1000 Genomes project. All the data were from the 1000 Genome Project dataset. (A) rs11225211 additive model ( $P = 0.116$ ); (B) rs11225211 dominant model ( $P = 0.082$ ); and (C) rs11225211 recessive model ( $P = 0.948$ ). Abbreviations: eQTL, expression quantitative trait loci.

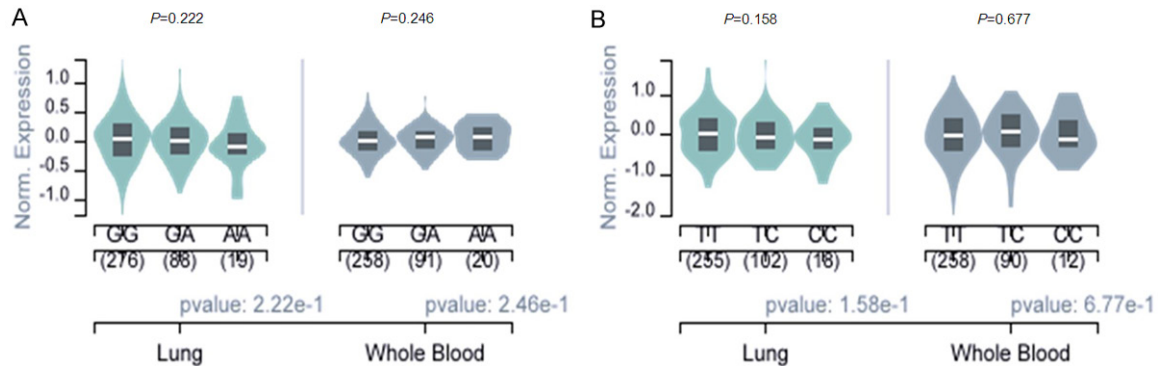

**Figure S5.** eQTL analysis of *BIRC3* rs11225211 and *NRG1* rs4733124 genotypes and corresponding gene mRNA expression in GTEx. All the data were from the GTEx dataset. A. rs11225211 in the lung tissues ( $P = 0.222$ ) and whole blood ( $P = 0.246$ ); B. rs4733124 in the lung tissues ( $P = 0.158$ ) and whole blood ( $P = 0.677$ ). Abbreviations: eQTL, expression quantitative trait loci.



## Genetic variants in the NLRP3 inflammasome pathway

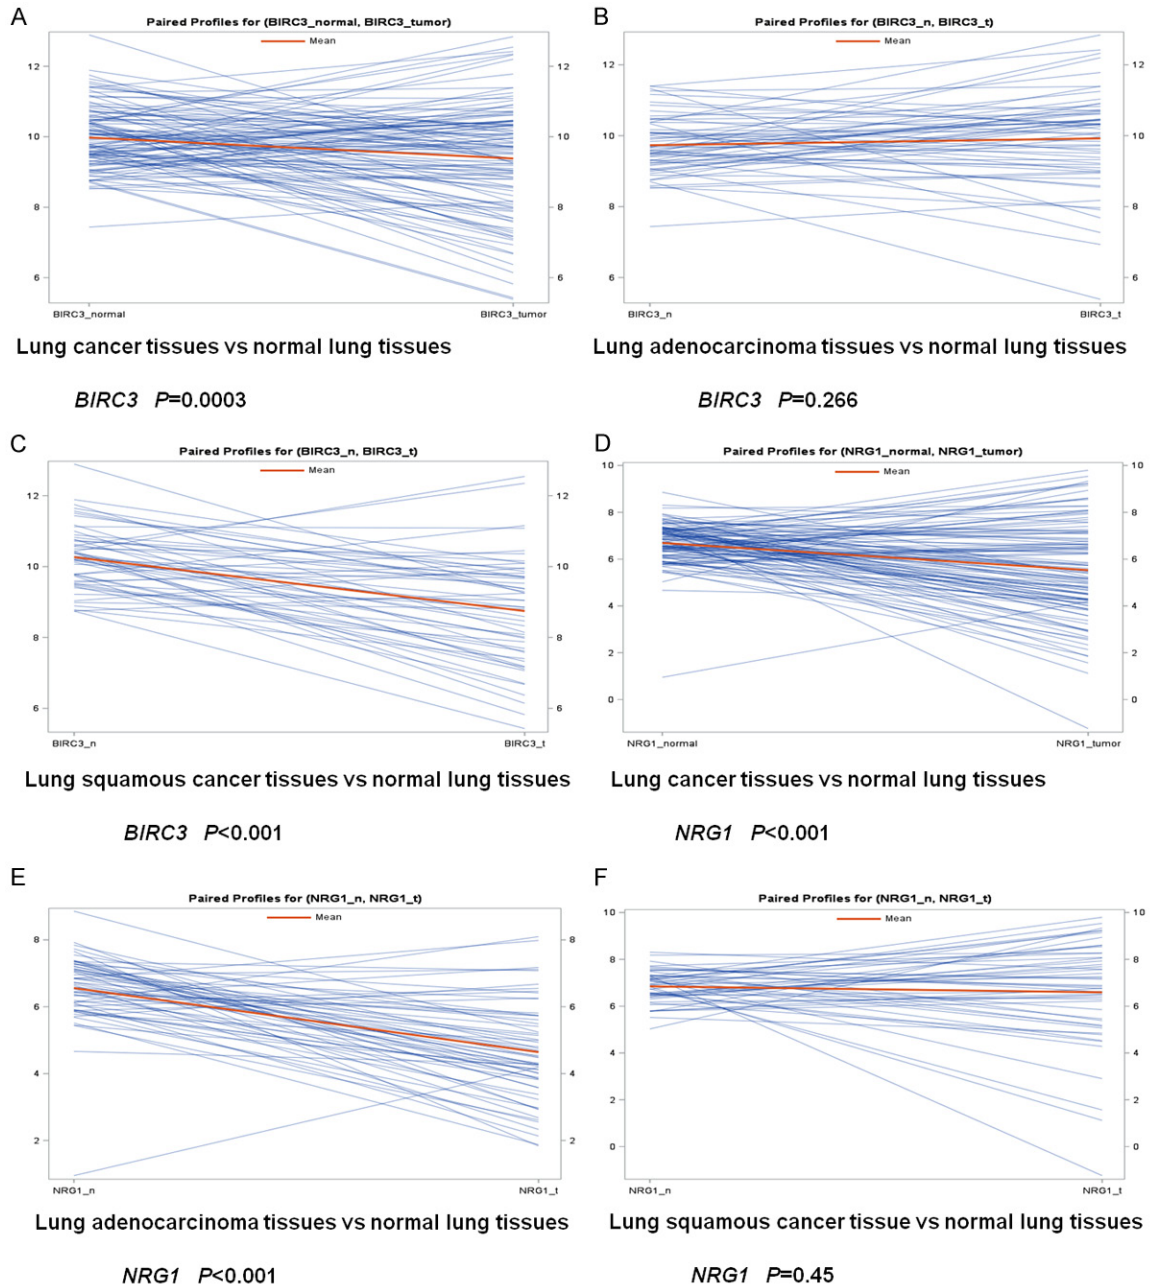

**Figure S6.** Comparison of mRNA expression levels of *BIRC3* and *NRG1* between lung cancer tissue and normal lung tissues in the TCGA dataset. A. The *BIRC3* mRNA expression levels in the lung cancer tissues were significantly lower than that in the normal lung tissues ( $P < 0.001$ ); B. The *BIRC3* mRNA expression levels in the lung adenocarcinoma tissues were significantly lower than that in the normal lung tissues ( $P < 0.001$ ); C. The *BIRC3* mRNA expression levels in the lung squamous tissues were significantly lower than that in the normal lung tissues ( $P < 0.001$ ); D. The *NRG1* mRNA expression levels in the lung cancer tissues were significantly lower than that in the normal lung tissues ( $P < 0.001$ ); E. The *NRG1* mRNA expression levels in the lung adenocarcinoma tissues were significantly lower than that in the normal lung tissues ( $P < 0.001$ ); F. The *NRG1* mRNA expression levels in the lung squamous tissues were significantly lower than that in the normal lung tissues ( $P = 0.45$ ); *BIRC3*\_t = lung cancer tissues; *BIRC3*\_n = adjacent normal lung tissues; *NRG1*\_t = lung cancer tissues; *NRG1*\_n = adjacent normal lung tissues.

## Genetic variants in the NLRP3 inflammasome pathway

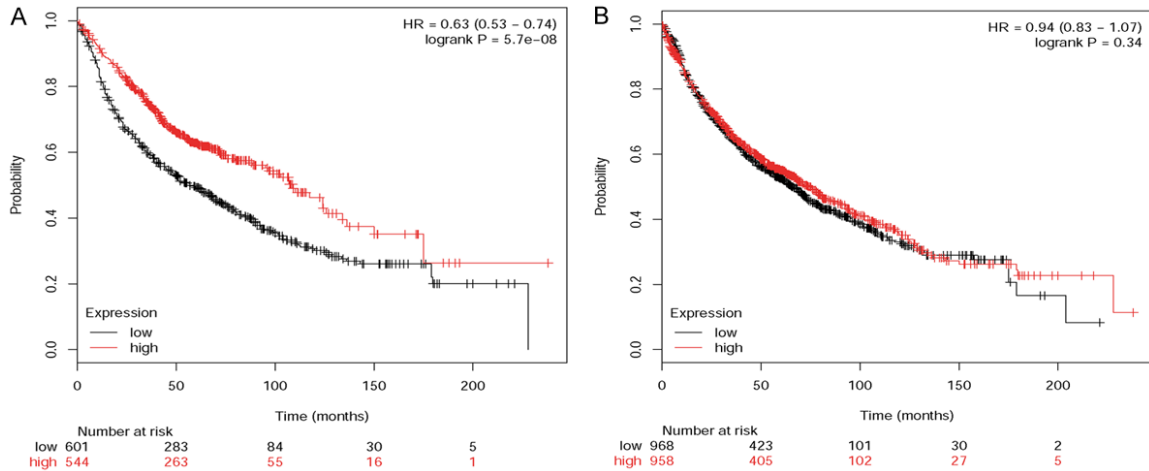

**Figure S7.** Kaplan-Meier analysis for patients with NSCLC by the two genes. Based on online survival analysis software ([www.kmplot.com/analysis](http://www.kmplot.com/analysis)). A. High *BIRC3* expression were associated with poorer survival of NSCLC; B. *NRG1* expression were not associated with overall survival of NSCLC significantly.

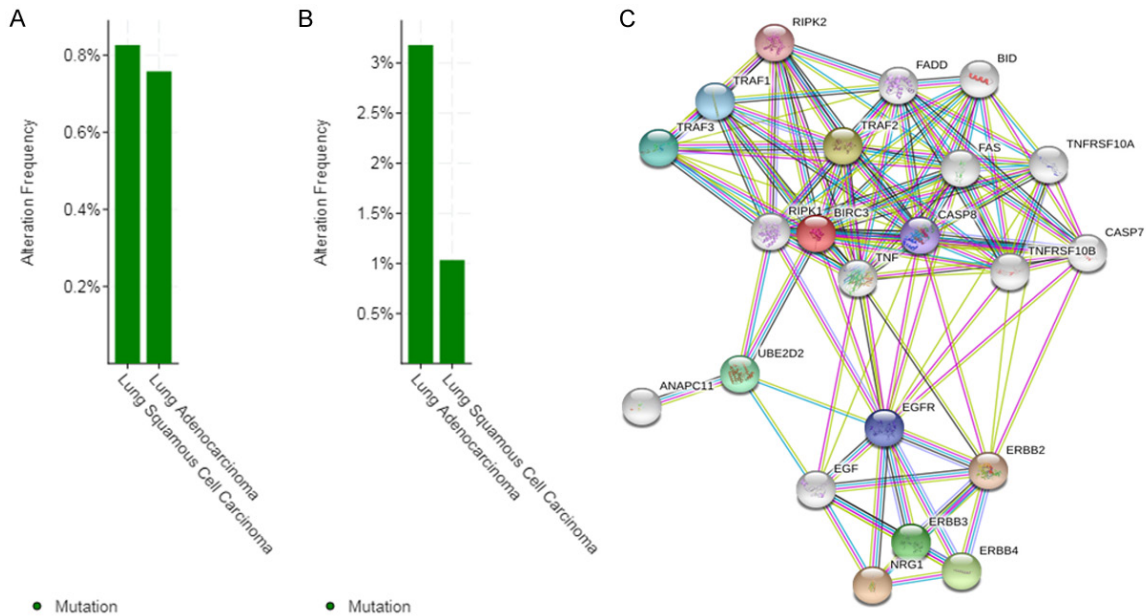

**Figure S8.** Mutation analysis of *BIRC3* and *NRG1* gene in non-small cell lung tumor tissues by using public available data in the database of the cBioportal for Cancer Genomics (<http://www.cbioportal.org>) and the network including the most frequently altered neighbor genes (<https://string-db.org/cgi/network.pl?taskId=36YKit07ing0>). A. *BIRC3* had low mutation frequency in LUSC and LUAD; B. *NRG1* had a relatively higher mutation frequency in LUSC and LUAD; C. *BIRC3* and *NRG1* were closely associated with altered neighbor genes.
